# Supplementary material for: Mechanisms Underlying Cognitive Effects of Inducing a Mindful State
Source: PubMed Central journal article supplement (PMC9400668; doi:10.5334/joc.205), 2022-01-21
Supplement: joc-5-1-205-s3.pdf [file joc-5-1-205-s3.pdf]

## Appendix C

### Supplementary Material Containing Statistical Analysis and Results Tables

#### Statistical Analyses

Analyses were carried out using the R statistics software (R Core Team, 2020). Generalized linear models were fitted using the package 'lme4' (Bates, Maechler, Bolker & Walker, 2015) and p-values were obtained with the package 'lmerTest' (Kuznetsova, Brockhoff & Christensen, 2017). Estimated marginal means were calculated using the 'emmeans' package by Lenth (2020). All plots were created with the 'ggplot2' package by Wickham (2016).

#### Contrast Coding

For all models, the measurement time factor was coded as 0 = pre-measurement and 1 = post-measurement. For the experimental condition factor, the non-treatment control condition was coded as the reference category (treatment coding). The effect of age was controlled by adding the participant's age (grand-mean centered) as a fixed effect. For accuracy, non-accurate trials were coded as the reference category.

**Table C1***Generalized Linear Mixed Model of RT During the Continuous Performance Task*

| <i>Predictors</i>                                             | <i>Estimates</i> | <i>SE</i>                   | <i>95% CI</i>   | <i>p</i>         |
|---------------------------------------------------------------|------------------|-----------------------------|-----------------|------------------|
| (Intercept)                                                   | 259.74           | 2.76                        | 254.33 – 265.16 | <b>&lt;0.001</b> |
| Time                                                          | -11.74           | 2.91                        | -17.44 – -6.05  | <b>&lt;0.001</b> |
| Condition <sub>Mindfulness</sub>                              | -7.44            | 3.34                        | -13.98 – -0.90  | <b>0.026</b>     |
| Condition <sub>PMR</sub>                                      | 2.80             | 4.58                        | -6.17 – 11.76   | 0.541            |
| ISI <sub>2000</sub>                                           | 15.26            | 0.80                        | 13.70 – 16.83   | <b>&lt;0.001</b> |
| ISI <sub>4000</sub>                                           | 49.13            | 0.88                        | 47.41 – 50.86   | <b>&lt;0.001</b> |
| Age <sub>Grand Mean Centered</sub>                            | 2.13             | 0.42                        | 1.31 – 2.95     | <b>&lt;0.001</b> |
| Time : Condition <sub>Mindfulness</sub>                       | -15.04           | 2.80                        | -20.54 – -9.54  | <b>&lt;0.001</b> |
| Time : Condition <sub>PMR</sub>                               | -0.05            | 2.93                        | -5.80 – 5.70    | 0.986            |
| Time : ISI <sub>2000</sub>                                    | 6.98             | 1.47                        | 4.11 – 9.85     | <b>&lt;0.001</b> |
| Time : ISI <sub>4000</sub>                                    | 1.04             | 1.64                        | -2.18 – 4.26    | 0.527            |
| Condition <sub>Mindfulness</sub> : ISI <sub>2000</sub>        | -7.27            | 1.53                        | -10.25 – -4.28  | <b>&lt;0.001</b> |
| Condition <sub>Mindfulness</sub> : ISI <sub>4000</sub>        | -12.00           | 1.81                        | -15.55 – -8.46  | <b>&lt;0.001</b> |
| Condition <sub>PMR</sub> : ISI <sub>2000</sub>                | -4.69            | 1.59                        | -7.80 – -1.57   | <b>0.003</b>     |
| Condition <sub>PMR</sub> : ISI <sub>4000</sub>                | -4.81            | 1.92                        | -8.58 – -1.04   | <b>0.012</b>     |
| Time : Condition <sub>Mindfulness</sub> : ISI <sub>2000</sub> | 8.04             | 2.23                        | 3.67 – 12.42    | <b>&lt;0.001</b> |
| Time : Condition <sub>Mindfulness</sub> : ISI <sub>4000</sub> | 4.51             | 2.79                        | -0.96 – 9.97    | 0.106            |
| Time : Condition <sub>PMR</sub> : ISI <sub>2000</sub>         | -17.11           | 2.57                        | -22.14 – -12.08 | <b>&lt;0.001</b> |
| Time : Condition <sub>PMR</sub> : ISI <sub>4000</sub>         | -21.63           | 2.83                        | -27.17 – -16.09 | <b>&lt;0.001</b> |
| <i>Random Effects</i>                                         |                  | <i>Model Specifications</i> |                 |                  |
| $\tau_{00}$ Subject                                           | 155.50           | Observations                | 46731           |                  |
| $\tau_{11}$ Subject : Time                                    | 238.69           | Df                          | 46708           |                  |
| $\rho_{01}$ Subject                                           | -0.06            | Deviance                    | 536141.3        |                  |
| N Subject                                                     | 78               | AIC                         | 536187.3        |                  |
|                                                               |                  | log-Likelihood              | -268070.6       |                  |

*Note.* P-values for fixed effects were calculated using Satterthwaites approximations. Confidence Intervals have been calculated using the Wald method. Model fit by maximum likelihood (Laplace Approximation); family: inverse.gaussian (identity).

**Table C2***Linear Regression of d' During the Continuous Performance Task*

| <i>Predictors</i>                                             | <i>Estimates</i> | <i>SE</i> | <i>95% CI</i> | <i>p</i>         |
|---------------------------------------------------------------|------------------|-----------|---------------|------------------|
| (Intercept)                                                   | 1.86             | 0.05      | 1.77 – 1.96   | <b>&lt;0.001</b> |
| Time                                                          | 0.12             | 0.10      | -0.08 – 0.31  | 0.240            |
| Condition <sub>Mindfulness</sub>                              | -0.06            | 0.12      | -0.30 – 0.19  | 0.643            |
| Condition <sub>PMR</sub>                                      | -0.01            | 0.12      | -0.25 – 0.23  | 0.953            |
| ISI <sub>2000</sub>                                           | 0.15             | 0.12      | -0.09 – 0.39  | 0.227            |
| ISI <sub>4000</sub>                                           | 0.39             | 0.12      | 0.15 – 0.63   | <b>0.001</b>     |
| Age <sub>Grand Mean Centered</sub>                            | 0.01             | 0.01      | -0.01 – 0.02  | 0.347            |
| Time : Condition <sub>Mindfulness</sub>                       | 0.30             | 0.25      | -0.19 – 0.78  | 0.23             |
| Time : Condition <sub>PMR</sub>                               | 0.62             | 0.24      | 0.15 – 1.09   | <b>0.01</b>      |
| Time : ISI <sub>2000</sub>                                    | 0.13             | 0.24      | -0.35 – 0.61  | 0.596            |
| Time : ISI <sub>4000</sub>                                    | 0.12             | 0.24      | -0.36 – 0.60  | 0.616            |
| Condition <sub>Mindfulness</sub> : ISI <sub>2000</sub>        | 0.23             | 0.30      | -0.37 – 0.82  | 0.459            |
| Condition <sub>Mindfulness</sub> : ISI <sub>4000</sub>        | 0.23             | 0.30      | -0.37 – 0.82  | 0.459            |
| Condition <sub>PMR</sub> : ISI <sub>2000</sub>                | 0.13             | 0.29      | -0.44 – 0.71  | 0.653            |
| Condition <sub>PMR</sub> : ISI <sub>4000</sub>                | 0.06             | 0.29      | -0.52 – 0.63  | 0.845            |
| Time : Condition <sub>Mindfulness</sub> : ISI <sub>2000</sub> | -0.65            | 0.61      | -1.85 – 0.54  | 0.283            |
| Time : Condition <sub>Mindfulness</sub> : ISI <sub>4000</sub> | -0.54            | 0.61      | -1.73 – 0.66  | 0.378            |
| Time : Condition <sub>PMR</sub> : ISI <sub>2000</sub>         | -0.66            | 0.58      | -1.81 – 0.49  | 0.260            |
| Time : Condition <sub>PMR</sub> : ISI <sub>4000</sub>         | -0.30            | 0.58      | -1.44 – 0.85  | 0.614            |
| <i>Model Specifications</i>                                   |                  |           |               |                  |
| Observations                                                  | 462              |           |               |                  |
| Df                                                            | 443              |           |               |                  |
| Deviance                                                      | 499.889          |           |               |                  |
| AIC                                                           | 1387.515         |           |               |                  |
| log-Likelihood                                                | -673.757         |           |               |                  |

*Note.* P-values for fixed effects were calculated using Satterthwaites approximations. Confidence Intervals have been calculated using the Wald method.

**Table C3***Linear Regression of Errors of Omission During the Continuous Performance Task*

| <i>Predictors</i>                                             | <i>Estimates</i> | <i>SE</i> | <i>95% CI</i>  | <i>p</i>         |
|---------------------------------------------------------------|------------------|-----------|----------------|------------------|
| (Intercept)                                                   | 6.41             | 0.57      | 5.29 – 7.53    | <b>&lt;0.001</b> |
| Time                                                          | 0.17             | 1.14      | -2.07 – 2.42   | 0.879            |
| Condition <sub>Mindfulness</sub>                              | -0.03            | 1.43      | -2.84 – 2.78   | 0.983            |
| Condition <sub>PMR</sub>                                      | -1.30            | 1.42      | -4.09 – 1.48   | 0.359            |
| ISI <sub>2000</sub>                                           | -4.96            | 1.40      | -7.70 – -2.21  | <b>&lt;0.001</b> |
| ISI <sub>4000</sub>                                           | -8.14            | 1.40      | -10.89 – -5.40 | <b>&lt;0.001</b> |
| Age <sub>Grand Mean Centered</sub>                            | 0.24             | 0.06      | 0.11 – 0.36    | <b>&lt;0.001</b> |
| Time : Condition <sub>Mindfulness</sub>                       | -0.04            | 2.85      | -5.65 – 5.57   | 0.989            |
| Time : Condition <sub>PMR</sub>                               | -6.64            | 2.75      | -12.05 – -1.23 | <b>0.016</b>     |
| Time : ISI <sub>2000</sub>                                    | -2.42            | 2.79      | -7.91 – 3.08   | 0.388            |
| Time : ISI <sub>4000</sub>                                    | -3.38            | 2.79      | -8.87 – 2.11   | 0.227            |
| Condition <sub>Mindfulness</sub> : ISI <sub>2000</sub>        | 0.28             | 3.50      | -6.59 – 7.15   | 0.936            |
| Condition <sub>Mindfulness</sub> : ISI <sub>4000</sub>        | -0.21            | 3.50      | -7.08 – 6.66   | 0.952            |
| Condition <sub>PMR</sub> : ISI <sub>2000</sub>                | 2.00             | 3.37      | -4.61 – 8.62   | 0.552            |
| Condition <sub>PMR</sub> : ISI <sub>4000</sub>                | 3.08             | 3.37      | -3.54 – 9.70   | 0.361            |
| Time : Condition <sub>Mindfulness</sub> : ISI <sub>2000</sub> | 1.28             | 6.99      | -12.46 – 15.02 | 0.855            |
| Time : Condition <sub>Mindfulness</sub> : ISI <sub>4000</sub> | -0.92            | 6.99      | -14.66 – 12.82 | 0.896            |
| Time : Condition <sub>PMR</sub> : ISI <sub>2000</sub>         | 4.19             | 6.73      | -9.05 – 17.42  | 0.534            |
| Time : Condition <sub>PMR</sub> : ISI <sub>4000</sub>         | 2.90             | 6.73      | -10.34 – 16.13 | 0.667            |

*Model Specifications*

|                |           |
|----------------|-----------|
| Observations   | 462       |
| Df             | 443       |
| Deviance       | 66289.447 |
| AIC            | 3645.493  |
| log-Likelihood | -1802.747 |

*Note.* P-values for fixed effects were calculated using Satterthwaites approximations. Confidence Intervals have been calculated using the Wald method.

**Table C4***Generalized Linear Mixed Model of RT During the N-Back Task*

| <i>Predictors</i>                                                | <i>Estimates</i> | <i>SE</i>                   | <i>95% CI</i>   | <i>p</i> |
|------------------------------------------------------------------|------------------|-----------------------------|-----------------|----------|
| (Intercept)                                                      | 531.47           | 5.23                        | 521.22 – 541.72 | <0.001   |
| Time                                                             | -74.73           | 3.51                        | -81.61 – -67.84 | <0.001   |
| Condition <sub>Mindfulness</sub>                                 | 1.12             | 3.80                        | -6.33 – 8.57    | 0.769    |
| Condition <sub>PMR</sub>                                         | -29.48           | 4.35                        | -38.01 – -20.95 | <0.001   |
| Nback <sub>2back</sub>                                           | 68.47            | 1.81                        | 64.92 – 72.02   | <0.001   |
| Nback <sub>3back</sub>                                           | 85.23            | 1.84                        | 81.63 – 88.83   | <0.001   |
| Age <sub>Grand Mean Centered</sub>                               | 1.43             | 0.76                        | -0.06 – 2.92    | 0.059    |
| Accuracy                                                         | -9.41            | 2.59                        | -14.48 – -4.34  | <0.001   |
| Target                                                           | 8.88             | 1.24                        | 6.45 – 11.31    | <0.001   |
| Time : Condition <sub>Mindfulness</sub>                          | -35.98           | 6.70                        | -49.10 – -22.85 | <0.001   |
| Time : Condition <sub>PMR</sub>                                  | -21.24           | 5.02                        | -31.08 – -11.40 | <0.001   |
| Time : Nback <sub>2back</sub>                                    | -27.38           | 2.58                        | -32.44 – -22.32 | <0.001   |
| Time : Nback <sub>3back</sub>                                    | -10.85           | 2.77                        | -16.27 – -5.43  | <0.001   |
| Condition <sub>Mindfulness</sub> : Nback <sub>2back</sub>        | -18.43           | 2.55                        | -23.44 – -13.43 | <0.001   |
| Condition <sub>Mindfulness</sub> : Nback <sub>3back</sub>        | -8.91            | 2.65                        | -23.44 – -13.43 | <0.001   |
| Condition <sub>PMR</sub> : Nback <sub>2back</sub>                | -25.08           | 2.97                        | -30.89 – -19.26 | <0.001   |
| Condition <sub>PMR</sub> : Nback <sub>3back</sub>                | -14.30           | 2.93                        | -20.05 – -8.56  | <0.001   |
| Time : Condition <sub>Mindfulness</sub> : Nback <sub>2back</sub> | 4.14             | 3.49                        | -2.70 – 10.97   | 0.235    |
| Time : Condition <sub>Mindfulness</sub> : Nback <sub>3back</sub> | 0.78             | 3.66                        | -6.39 – 7.95    | 0.832    |
| Time : Condition <sub>PMR</sub> : Nback <sub>2back</sub>         | -4.48            | 3.11                        | -10.58 – 1.62   | 0.150    |
| Time : Condition <sub>PMR</sub> : Nback <sub>3back</sub>         | 3.66             | 4.33                        | -4.83 – 12.14   | 0.398    |
| <i>Random Effects</i>                                            |                  | <i>Model Specifications</i> |                 |          |
| $\tau_{00}$ Subject                                              | 1165.75          | Observations                | 41084           |          |
| $\tau_{11}$ Subject : Time                                       | 1106.84          | Df                          | 41059           |          |
| $\rho_{01}$ Subject                                              | -0.17            | Deviance                    | 532840.305      |          |
| N Subject                                                        | 78               | AIC                         | 532890.305      |          |
|                                                                  |                  | log-Likelihood              | -266420.152     |          |

*Note.* P-values for fixed effects were calculated using Satterthwaites approximations. Confidence Intervals have been calculated using the Wald method. Model fit by maximum likelihood (Laplace Approximation); family: inverse.gaussian (identity).

**Table C5***Linear Regression of d' During the N-Back Task*

| <i>Predictors</i>                                                | <i>Estimates</i> | <i>SE</i> | <i>95% CI</i> | <i>p</i>         |
|------------------------------------------------------------------|------------------|-----------|---------------|------------------|
| (Intercept)                                                      | 2.26             | 0.05      | 2.17 – 2.35   | <b>&lt;0.001</b> |
| Time                                                             | 0.02             | 0.09      | -0.16 – 0.20  | 0.820            |
| Condition <sub>Mindfulness</sub>                                 | 0.16             | 0.12      | -0.07 – 0.39  | 0.167            |
| Condition <sub>PMR</sub>                                         | 0.12             | 0.12      | -0.11 – 0.35  | 0.292            |
| Nback <sub>2back</sub>                                           | -0.48            | 0.11      | -0.70 – -0.27 | <b>&lt;0.001</b> |
| Nback <sub>3back</sub>                                           | -1.30            | 0.11      | -1.52 – -1.08 | <b>&lt;0.001</b> |
| Age <sub>Grand Mean Centered</sub>                               | -0.01            | 0.00      | -0.01 – 0.00  | 0.183            |
| Time : Condition <sub>Mindfulness</sub>                          | 0.12             | 0.22      | -0.30 – 0.55  | 0.568            |
| Time : Condition <sub>PMR</sub>                                  | 0.21             | 0.22      | -0.22 – 0.64  | 0.333            |
| Time : Nback <sub>2back</sub>                                    | 0.33             | 0.22      | -0.10 – 0.77  | 0.132            |
| Time : Nback <sub>3back</sub>                                    | 0.27             | 0.22      | -0.17 – 0.70  | 0.231            |
| Condition <sub>Mindfulness</sub> : Nback <sub>2back</sub>        | -0.06            | 0.27      | -0.59 – 0.46  | 0.814            |
| Condition <sub>Mindfulness</sub> : Nback <sub>3back</sub>        | -0.16            | 0.27      | -0.68 – 0.37  | 0.560            |
| Condition <sub>PMR</sub> : Nback <sub>2back</sub>                | -0.17            | 0.27      | -0.70 – 0.36  | 0.525            |
| Condition <sub>PMR</sub> : Nback <sub>3back</sub>                | -0.22            | 0.27      | -0.75 – 0.31  | 0.412            |
| Time : Condition <sub>Mindfulness</sub> : Nback <sub>2back</sub> | -0.62            | 0.53      | -1.67 – 0.43  | 0.245            |
| Time : Condition <sub>Mindfulness</sub> : Nback <sub>3back</sub> | -0.76            | 0.53      | -1.81 – 0.29  | 0.155            |
| Time : Condition <sub>PMR</sub> : Nback <sub>2back</sub>         | -0.26            | 0.54      | -1.31 – 0.79  | 0.625            |
| Time : Condition <sub>PMR</sub> : Nback <sub>3back</sub>         | -0.18            | 0.54      | -1.24 – 0.89  | 0.746            |
| <i>Model Specifications</i>                                      |                  |           |               |                  |
| Observations                                                     | 495              |           |               |                  |
| Df                                                               | 476              |           |               |                  |
| Deviance                                                         | 476.863          |           |               |                  |
| AIC                                                              | 1426.271         |           |               |                  |
| log-Likelihood                                                   | -693.136         |           |               |                  |

*Note.* P-values for fixed effects were calculated using Satterthwaites approximations. Confidence Intervals have been calculated using the Wald method.

**Table C6***Linear Regression of Errors of Omission During the N-Back Task*

| <i>Predictors</i>                                                | <i>Estimates</i> | <i>SE</i> | <i>95% CI</i> | <i>p</i>         |
|------------------------------------------------------------------|------------------|-----------|---------------|------------------|
| (Intercept)                                                      | 6.51             | 0.21      | 6.10 – 6.92   | <b>&lt;0.001</b> |
| Time                                                             | 0.15             | 0.21      | -0.26 – 0.56  | 0.469            |
| Condition <sub>Mindfulness</sub>                                 | -0.59            | 0.54      | -1.64 – 0.46  | 0.271            |
| Condition <sub>PMR</sub>                                         | -0.17            | 0.54      | -1.23 – 0.90  | 0.758            |
| Nback <sub>2back</sub>                                           | 1.05             | 0.52      | 0.04 – 2.06   | <b>0.043</b>     |
| Nback <sub>3back</sub>                                           | 5.54             | 0.52      | 4.52 – 6.55   | <b>&lt;0.001</b> |
| Age <sub>Grand Mean Centered</sub>                               | 0.03             | 0.02      | -0.01 – 0.07  | 0.179            |
| Time : Condition <sub>Mindfulness</sub>                          | -0.66            | 0.51      | -1.66 – 0.34  | 0.194            |
| Time : Condition <sub>PMR</sub>                                  | -1.03            | 0.51      | -2.03 – -0.03 | <b>0.044</b>     |
| Time : Nback <sub>2back</sub>                                    | 0.46             | 0.52      | -0.55 – 1.48  | 0.369            |
| Time : Nback <sub>3back</sub>                                    | 0.47             | 0.52      | -0.54 – 1.48  | 0.362            |
| Condition <sub>Mindfulness</sub> : Nback <sub>2back</sub>        | 0.33             | 1.24      | -2.11 – 2.77  | 0.788            |
| Condition <sub>Mindfulness</sub> : Nback <sub>3back</sub>        | -1.09            | 1.24      | -3.53 – 1.35  | 0.382            |
| Condition <sub>PMR</sub> : Nback <sub>2back</sub>                | -0.24            | 1.24      | -2.69 – 2.20  | 0.844            |
| Condition <sub>PMR</sub> : Nback <sub>3back</sub>                | -0.41            | 1.25      | -2.87 – 2.06  | 0.744            |
| Time : Condition <sub>Mindfulness</sub> : Nback <sub>2back</sub> | -0.51            | 1.24      | -2.94 – 1.93  | 0.684            |
| Time : Condition <sub>Mindfulness</sub> : Nback <sub>3back</sub> | 1.53             | 1.24      | -0.91 – 3.97  | 0.218            |
| Time : Condition <sub>PMR</sub> : Nback <sub>2back</sub>         | 0.45             | 1.24      | -2.00 – 2.89  | 0.720            |
| Time : Condition <sub>PMR</sub> : Nback <sub>3back</sub>         | 0.47             | 1.25      | -2.00 – 2.93  | 0.709            |
| <i>Model Specifications</i>                                      |                  |           |               |                  |
| Observations                                                     | 462              |           |               |                  |
| Df                                                               | 443              |           |               |                  |
| Deviance                                                         | 66289.447        |           |               |                  |
| AIC                                                              | 3645.493         |           |               |                  |
| log-Likelihood                                                   | -1802.747        |           |               |                  |

*Note.* P-values for fixed effects were calculated using Satterthwaites approximations. Confidence Intervals have been calculated using the Wald method.

**Table C7***Generalized Linear Mixed Model of RT During the Number-Letter Task*

| <i>Predictors</i>                                | <i>Estimates</i> | <i>SE</i>                   | <i>95% CI</i>   | <i>p</i>         |
|--------------------------------------------------|------------------|-----------------------------|-----------------|------------------|
| (Intercept)                                      | 583.70           | 5.84                        | 572.26 – 595.14 | <b>&lt;0.001</b> |
| Time                                             | -80.91           | 4.79                        | -90.30 – -71.52 | <b>&lt;0.001</b> |
| Condition <sub>Mindfulness</sub>                 | 2.77             | 6.19                        | -9.36 – 14.91   | 0.654            |
| Condition <sub>PMR</sub>                         | 4.64             | 5.43                        | -6.00 – 15.28   | 0.393            |
| Switch                                           | 97.76            | 3.59                        | 90.74 – 104.79  | <b>&lt;0.001</b> |
| Accuracy                                         | 26.12            | 5.54                        | 15.25 – 36.98   | <b>&lt;0.001</b> |
| Age <sub>Grand Mean Centered</sub>               | 1.42             | 0.77                        | -0.09 – 2.94    | 0.066            |
| Time : Condition <sub>Mindfulness</sub>          | -28.08           | 6.78                        | -41.36 – -14.79 | <b>&lt;0.001</b> |
| Time : Condition <sub>PMR</sub>                  | -9.90            | 5.89                        | -21.44 – 1.63   | 0.092            |
| Time : Switch                                    | -44.77           | 5.02                        | -54.61 – -34.92 | <b>&lt;0.001</b> |
| Condition <sub>Mindfulness</sub> : Switch        | -39.44           | 4.67                        | -48.59 – -30.29 | <b>&lt;0.001</b> |
| Condition <sub>PMR</sub> : Switch                | -18.97           | 5.55                        | -29.85 – -8.10  | <b>0.001</b>     |
| Time : Condition <sub>Mindfulness</sub> : Switch | -2.76            | 6.68                        | -15.85 – 10.33  | 0.679            |
| Time : Condition <sub>PMR</sub> : Switch         | 29.4             | 7.73                        | 14.24 – 44.56   | <b>&lt;0.001</b> |
| <i>Random Effects</i>                            |                  | <i>Model Specifications</i> |                 |                  |
| $\tau_{00}$ Subject                              | 1873.85          | Observations                | 20980           |                  |
| $\tau_{11}$ Subject : Time                       | 1092.14          | Df                          | 20962           |                  |
| $\rho_{01}$ Subject                              | -0.08            | Deviance                    | 293658.086      |                  |
| N Subject                                        | 77               | AIC                         | 293694.086      |                  |
|                                                  |                  | log-Likelihood              | -146829.043     |                  |

*Note.* P-values for fixed effects were calculated using Satterthwaites approximations. Confidence Intervals have been calculated using the Wald method. Model fit by maximum likelihood (Laplace Approximation); family: inverse.gaussian (identity).



**Table C8***Multilevel Logistic Regression of Accuracy During the Number-Letter Task*

| <i>Predictors</i>                                | <i>Estimates</i> | <i>SE</i>                   | <i>95% CI</i> | <i>p</i>         |
|--------------------------------------------------|------------------|-----------------------------|---------------|------------------|
| (Intercept)                                      | 2.90             | 0.09                        | 2.72 – 3.08   | <b>&lt;0.001</b> |
| Switch                                           | -0.33            | 0.06                        | -0.45 – -0.22 | <b>&lt;0.001</b> |
| Condition <sub>Mindfulness</sub>                 | -0.49            | 0.23                        | -0.93 – -0.05 | <b>0.030</b>     |
| Condition <sub>PMR</sub>                         | -0.11            | 0.23                        | -0.55 – 0.34  | 0.639            |
| Time                                             | -0.05            | 0.09                        | -0.21 – 0.12  | 0.583            |
| Age <sub>Grand Mean Centered</sub>               | -0.01            | 0.01                        | -0.02 – 0.01  | 0.404            |
| Condition <sub>Mindfulness</sub> : Switch        | 0.20             | 0.14                        | -0.07 – 0.48  | 0.152            |
| Condition <sub>PMR</sub> : Switch                | 0.19             | 0.15                        | -0.10 – 0.49  | 0.200            |
| Time : Switch                                    | -0.26            | 0.12                        | -0.50 – -0.03 | <b>0.027</b>     |
| Time : Condition <sub>Mindfulness</sub>          | 0.09             | 0.20                        | -0.30 – 0.48  | 0.667            |
| Time : Condition <sub>PMR</sub>                  | 0.10             | 0.21                        | -0.31 – 0.50  | 0.638            |
| Time : Condition <sub>Mindfulness</sub> : Switch | 0.35             | 0.28                        | -0.21 – 0.90  | 0.219            |
| Time : Condition <sub>PMR</sub> : Switch         | 0.18             | 0.30                        | -0.41 – 0.77  | 0.553            |
| <i>Random Effects</i>                            |                  | <i>Model Specifications</i> |               |                  |
| $\tau_{00}$ Subject                              | 0.55             | Observations                | 20980         |                  |
| $\tau_{11}$ Subject : Time                       | 0.20             | Df                          | 20964         |                  |
| $\rho_{01}$ Subject                              | -0.10            | Deviance                    | 9216.621      |                  |
| N Subject                                        | 77               | AIC                         | 9248.621      |                  |
|                                                  |                  | log-Likelihood              | -4608.311     |                  |

*Note.* P-values for fixed effects were calculated using Satterthwaites approximations. Confidence Intervals have been calculated using the Wald method. Model fit by maximum likelihood (Laplace Approximation); family: binomial (logit).

**Table C9***Generalized Linear Mixed Model of RT During the Attention Network Task for the Executive Control Network*

| <i>Predictors</i>                                | <i>Estimates</i> | <i>SE</i>                   | <i>95% CI</i>   | <i>p</i>         |
|--------------------------------------------------|------------------|-----------------------------|-----------------|------------------|
| (Intercept)                                      | 375.98           | 2.74                        | 370.62 – 381.35 | <b>&lt;0.001</b> |
| Target                                           | 103.58           | 0.90                        | 101.82 – 105.35 | <b>&lt;0.001</b> |
| Age <sub>Grand Mean Centered</sub>               | 3.39             | 0.53                        | 2.35 – 4.43     | <b>&lt;0.001</b> |
| Accuracy                                         | 82.79            | 1.32                        | 80.20 – 85.37   | <b>&lt;0.001</b> |
| Time                                             | -37.82           | 2.55                        | -42.81 – -32.82 | <b>&lt;0.001</b> |
| Condition <sub>Mindfulness</sub>                 | -20.7            | 3.72                        | -28.00 – -13.41 | <b>&lt;0.001</b> |
| Condition <sub>PMR</sub>                         | 13.02            | 3.68                        | 5.82 – 20.23    | <b>&lt;0.001</b> |
| Cue <sub>Middle</sub>                            | -11.29           | 1.10                        | -13.45 – -9.14  | <b>&lt;0.001</b> |
| Cue <sub>Spatial</sub>                           | -12.32           | 1.11                        | -14.49 – -10.14 | <b>&lt;0.001</b> |
| Cue <sub>Double</sub>                            | -11.93           | 1.10                        | -14.09 – -9.77  | <b>&lt;0.001</b> |
| Time : Condition <sub>Mindfulness</sub>          | 0.07             | 4.51                        | -8.77 – 8.92    | 0.987            |
| Time : Condition <sub>PMR</sub>                  | -7.33            | 4.12                        | -15.40 – 0.74   | 0.075            |
| Time : Target                                    | -21.44           | 1.66                        | -24.70 – -18.18 | <b>&lt;0.001</b> |
| Condition <sub>Mindfulness</sub> : Target        | -10.18           | 1.84                        | -13.80 – -6.57  | <b>&lt;0.001</b> |
| Condition <sub>PMR</sub> : Target                | 3.60             | 2.06                        | -0.44 – 7.63    | 0.081            |
| Time : Condition <sub>Mindfulness</sub> : Target | -12.66           | 2.58                        | -17.72 – -7.61  | <b>&lt;0.001</b> |
| Time : Condition <sub>PMR</sub> : Target         | -14.02           | 2.57                        | -19.05 – -8.99  | <b>&lt;0.001</b> |
| <i>Random Effects</i>                            |                  | <i>Model Specifications</i> |                 |                  |
| $\tau_{00}$ Subject                              | 261.62           | Observations                | 46658           |                  |
| $\tau_{11}$ Subject : Time                       | 354.24           | Df                          | 46637           |                  |
| $\rho_{01}$ Subject                              | -0.07            | Deviance                    | 558291.759      |                  |
| N Subject                                        | 77               | AIC                         | 558333.759      |                  |
|                                                  |                  | log-Likelihood              | -279145.88      |                  |

*Note.* P-values for fixed effects were calculated using Satterthwaites approximations. Confidence Intervals have been calculated using the Wald method. Model fit by maximum likelihood (Laplace Approximation); family: inverse.gaussian (identity).

**Table C10***Generalized Linear Mixed Model of RT During the Attention Network Task for the Alerting & Orienting Network*

| <i>Predictors</i>                                                | <i>Estimates</i> | <i>SE</i>                   | <i>95% CI</i>   | <i>p</i>         |
|------------------------------------------------------------------|------------------|-----------------------------|-----------------|------------------|
| (Intercept)                                                      | 374.36           | 3.76                        | 367.00 – 381.73 | <b>&lt;0.001</b> |
| Target                                                           | 101.11           | 0.92                        | 99.30 – 102.91  | <b>&lt;0.001</b> |
| Age <sub>Grand Mean Centered</sub>                               | 3.41             | 0.55                        | 2.33 – 4.49     | <b>&lt;0.001</b> |
| Accuracy                                                         | 84.13            | 1.34                        | 81.50 – 86.76   | <b>&lt;0.001</b> |
| Time                                                             | -34.76           | 3.80                        | -42.20 – -27.31 | <b>&lt;0.001</b> |
| Condition <sub>Mindfulness</sub>                                 | -19.06           | 5.48                        | -29.80 – -8.33  | <b>0.001</b>     |
| Condition <sub>PMR</sub>                                         | 12.41            | 8.37                        | -4.00 – 28.82   | 0.138            |
| Cue <sub>Middle</sub>                                            | -11.39           | 1.17                        | -13.69 – -9.09  | <b>&lt;0.001</b> |
| Cue <sub>Spatial</sub>                                           | -12.67           | 1.16                        | -14.94 – -10.40 | <b>&lt;0.001</b> |
| Cue <sub>Double</sub>                                            | -11.85           | 1.18                        | -14.17 – -9.53  | <b>&lt;0.001</b> |
| Time : Condition <sub>Mindfulness</sub>                          | 1.97             | 7.30                        | -12.34 – 16.28  | 0.787            |
| Time : Condition <sub>PMR</sub>                                  | -5.34            | 4.64                        | -14.43 – 3.76   | 0.250            |
| Time : Cue <sub>Middle</sub>                                     | 1.86             | 1.98                        | -2.02 – 5.74    | 0.347            |
| Time : Cue <sub>Spatial</sub>                                    | 1.32             | 1.97                        | -2.55 – 5.19    | 0.504            |
| Time : Cue <sub>Double</sub>                                     | -2.71            | 1.93                        | -6.49 – 1.07    | 0.160            |
| Condition <sub>Mindfulness</sub> : Cue <sub>Middle</sub>         | 2.65             | 2.30                        | -1.86 – 7.15    | 0.250            |
| Condition <sub>Mindfulness</sub> : Cue <sub>Spatial</sub>        | 1.89             | 2.58                        | -3.16 – 6.94    | 0.463            |
| Condition <sub>Mindfulness</sub> : Cue <sub>Double</sub>         | 3.56             | 2.21                        | -0.77 – 7.89    | 0.107            |
| Condition <sub>PMR</sub> : Cue <sub>Middle</sub>                 | 6.33             | 2.65                        | 1.13 – 11.52    | <b>0.017</b>     |
| Condition <sub>PMR</sub> : Cue <sub>Spatial</sub>                | -1.95            | 2.75                        | -7.33 – 3.43    | 0.478            |
| Condition <sub>PMR</sub> : Cue <sub>Double</sub>                 | 4.62             | 2.76                        | -0.80 – 10.04   | 0.095            |
| Time : Condition <sub>Mindfulness</sub> : Cue <sub>Middle</sub>  | 12.36            | 3.49                        | 5.52 – 19.20    | <b>&lt;0.001</b> |
| Time : Condition <sub>Mindfulness</sub> : Cue <sub>Spatial</sub> | 9.23             | 3.49                        | 2.39 – 16.07    | <b>0.008</b>     |
| Time : Condition <sub>Mindfulness</sub> : Cue <sub>Double</sub>  | 3.51             | 4.27                        | -4.87 – 11.88   | 0.412            |
| Time : Condition <sub>PMR</sub> : Cue <sub>Middle</sub>          | 6.00             | 3.76                        | -1.37 – 13.37   | 0.110            |
| Time : Condition <sub>PMR</sub> : Cue <sub>Spatial</sub>         | 12.49            | 5.09                        | 2.52 – 22.46    | <b>0.014</b>     |
| Time : Condition <sub>PMR</sub> : Cue <sub>Double</sub>          | 9.54             | 4.39                        | 0.94 – 18.13    | <b>0.030</b>     |
| <i>Random Effects</i>                                            |                  | <i>Model Specifications</i> |                 |                  |
| $\tau_{00}$ Subject                                              | 262.41           | Observations                | 46658           |                  |
| $\tau_{11}$ Subject : Time                                       | 353.58           | Df                          | 46627           |                  |
| $\rho_{01}$ Subject                                              | -0.08            | Deviance                    | 558476.054      |                  |
| N Subject                                                        | 77               | AIC                         | 558538.054      |                  |
|                                                                  |                  | log-Likelihood              | -279238.027     |                  |

*Note.* P-values for fixed effects were calculated using Satterthwaites approximations. Confidence Intervals have been calculated using the Wald method. Model fit by maximum likelihood (Laplace Approximation); family: inverse.gaussian (identity).

**Table C11***Multilevel Logistic Regression of Accuracy During the Attention Network Task for the Executive Control Network*

| <i>Predictors</i>                                | <i>Estimates</i> | <i>SE</i>                   | <i>95% CI</i> | <i>p</i>         |
|--------------------------------------------------|------------------|-----------------------------|---------------|------------------|
| (Intercept)                                      | 3.73             | 0.14                        | 3.45 – 4.01   | <b>&lt;0.001</b> |
| Target                                           | -2.76            | 0.07                        | -2.89 – -2.64 | <b>&lt;0.001</b> |
| Condition <sub>Mindfulness</sub>                 | 0.40             | 0.36                        | -0.30 – 1.10  | 0.265            |
| Condition <sub>PMR</sub>                         | 0.22             | 0.37                        | -0.51 – 0.95  | 0.558            |
| Time                                             | 0.03             | 0.14                        | -0.24 – 0.30  | 0.838            |
| Cue <sub>Middle</sub>                            | -0.08            | 0.06                        | -0.19 – 0.04  | 0.193            |
| Cue <sub>Spatial</sub>                           | -0.09            | 0.06                        | -0.21 – 0.03  | 0.132            |
| Cue <sub>Double</sub>                            | -0.07            | 0.06                        | -0.19 – 0.04  | 0.211            |
| Age <sub>Grand Mean Centered</sub>               | 0.05             | 0.02                        | 0.02 – 0.08   | <b>0.001</b>     |
| Condition <sub>Mindfulness</sub> : Target        | -2.06            | 0.16                        | -2.38 – -1.74 | <b>&lt;0.001</b> |
| Condition <sub>PMR</sub> : Target                | -0.31            | 0.15                        | -0.60 – -0.01 | <b>0.042</b>     |
| Time : Target                                    | 0.27             | 0.13                        | 0.02 – 0.53   | <b>0.034</b>     |
| Time : Condition <sub>Mindfulness</sub>          | -0.26            | 0.33                        | -0.90 – 0.39  | 0.437            |
| Time : Condition <sub>PMR</sub>                  | -0.49            | 0.34                        | -1.15 – 0.16  | 0.141            |
| Time : Condition <sub>Mindfulness</sub> : Target | 0.13             | 0.33                        | -0.52 – 0.77  | 0.693            |
| Time : Condition <sub>PMR</sub> : Target         | 0.02             | 0.30                        | -0.57 – 0.61  | 0.946            |
| <i>Random Effects</i>                            |                  | <i>Model Specifications</i> |               |                  |
| $\tau_{00}$ Subject                              | 1.48             | Observations                | 46843         |                  |
| $\tau_{11}$ Subject : Time                       | 1.00             | Df                          | 46824         |                  |
| $\rho_{01}$ Subject                              | -0.25            | Deviance                    | 16872.924     |                  |
| N Subject                                        | 77               | AIC                         | 16910.924     |                  |
|                                                  |                  | log-Likelihood              | -8436.462     |                  |

*Note.* P-values for fixed effects were calculated using Satterthwaites approximations. Confidence Intervals have been calculated using the Wald method. Model fit by maximum likelihood (Laplace Approximation); family: binomial (logit).

**Table C12**

*Multilevel Logistic Regression of Accuracy During the Attention Network Task for the Alerting & Orienting Network*

| <i>Predictors</i>                                                | <i>Estimates</i> | <i>SE</i>                   | <i>95% CI</i> | <i>p</i>         |
|------------------------------------------------------------------|------------------|-----------------------------|---------------|------------------|
| (Intercept)                                                      | 3.78             | 0.14                        | 3.50 – 4.06   | <b>&lt;0.001</b> |
| Cue <sub>Middle</sub>                                            | -0.08            | 0.06                        | -0.19 – 0.04  | 0.210            |
| Cue <sub>Spatial</sub>                                           | -0.09            | 0.06                        | -0.20 – 0.03  | 0.149            |
| Cue <sub>Double</sub>                                            | -0.06            | 0.06                        | -0.18 – 0.06  | 0.340            |
| Condition <sub>Mindfulness</sub>                                 | -0.42            | 0.34                        | -1.09 – 0.25  | 0.218            |
| Condition <sub>PMR</sub>                                         | 0.11             | 0.36                        | -0.59 – 0.81  | 0.761            |
| Time                                                             | 0.14             | 0.14                        | -0.12 – 0.41  | 0.298            |
| Target                                                           | -2.90            | 0.07                        | -3.03 – -2.77 | <b>&lt;0.001</b> |
| Age <sub>Grand Mean Centered</sub>                               | 0.05             | 0.02                        | 0.02 – 0.08   | <b>0.001</b>     |
| Condition <sub>Mindfulness</sub> : Cue <sub>Middle</sub>         | -0.04            | 0.14                        | -0.33 – 0.24  | 0.771            |
| Condition <sub>Mindfulness</sub> : Cue <sub>Spatial</sub>        | -0.09            | 0.14                        | -0.37 – 0.20  | 0.552            |
| Condition <sub>Mindfulness</sub> : Cue <sub>Double</sub>         | -0.16            | 0.14                        | -0.45 – 0.12  | 0.252            |
| Condition <sub>PMR</sub> : Cue <sub>Middle</sub>                 | -0.11            | 0.15                        | -0.42 – 0.19  | 0.459            |
| Condition <sub>PMR</sub> : Cue <sub>Spatial</sub>                | -0.02            | 0.15                        | -0.32 – 0.28  | 0.886            |
| Condition <sub>PMR</sub> : Cue <sub>Double</sub>                 | -0.01            | 0.16                        | -0.31 – 0.30  | 0.972            |
| Time : Cue <sub>Middle</sub>                                     | 0.15             | 0.12                        | -0.08 – 0.39  | 0.206            |
| Time : Cue <sub>Spatial</sub>                                    | -0.03            | 0.12                        | -0.26 – 0.20  | 0.802            |
| Time : Cue <sub>Double</sub>                                     | -0.05            | 0.12                        | -0.29 – 0.18  | 0.649            |
| Time : Condition <sub>Mindfulness</sub>                          | -0.21            | 0.32                        | -0.84 – 0.41  | 0.504            |
| Time : Condition <sub>PMR</sub>                                  | -0.53            | 0.34                        | -1.19 – 0.13  | 0.118            |
| Time : Condition <sub>Mindfulness</sub> : Cue <sub>Middle</sub>  | -0.40            | 0.29                        | -0.96 – 0.17  | 0.167            |
| Time : Condition <sub>Mindfulness</sub> : Cue <sub>Spatial</sub> | -0.28            | 0.28                        | -0.84 – 0.27  | 0.318            |
| Time : Condition <sub>Mindfulness</sub> : Cue <sub>Double</sub>  | -0.33            | 0.29                        | -0.89 – 0.23  | 0.251            |
| Time : Condition <sub>PMR</sub> : Cue <sub>Middle</sub>          | 0.06             | 0.31                        | -0.54 – 0.67  | 0.840            |
| Time : Condition <sub>PMR</sub> : Cue <sub>Spatial</sub>         | 0.27             | 0.31                        | -0.33 – 0.87  | 0.380            |
| Time : Condition <sub>PMR</sub> : Cue <sub>Double</sub>          | -0.19            | 0.31                        | -0.80 – 0.42  | 0.546            |
| <i>Random Effects</i>                                            |                  | <i>Model Specifications</i> |               |                  |
| $\tau_{00}$ Subject                                              | 1.40             | Observations                | 46843         |                  |
| $\tau_{11}$ Subject : Time                                       | 1.14             | Df                          | 46814         |                  |
| $\rho_{01}$ Subject                                              | -0.28            | Deviance                    | 17056.148     |                  |
| N Subject                                                        | 77               | AIC                         | 17114.148     |                  |
|                                                                  |                  | log-Likelihood              | -8528.074     |                  |

*Note.* P-values for fixed effects were calculated using Satterthwaites approximations. Confidence Intervals have been calculated using the Wald method. Model fit by maximum likelihood (Laplace Approximation); family: binomial (logit).
