# Supplementary material for: Mechanisms Underlying Cognitive Effects of Inducing a Mindful State
Source: PubMed Central journal article supplement (PMC9400668; doi:10.5334/joc.205), 2022-01-21
Supplement: joc-5-1-205-s4.pdf [file joc-5-1-205-s4.pdf]

**Appendix D*****Generalized Linear Mixed Model Comparison of Measures of Attentional Control and Executive Functioning***

| Task                             | Model               | AIC    | BIC    | logLik  | deviance | df | LRT Test against final |         |         |
|----------------------------------|---------------------|--------|--------|---------|----------|----|------------------------|---------|---------|
|                                  |                     |        |        |         |          |    | Chi df                 | X2      | p       |
| CPT                              | Interaction (final) | 536187 | 536389 | -268071 | 536141   | 23 | -                      | -       | -       |
|                                  | Main Effects        | 536273 | 536370 | -268126 | 536251   | 11 | 12                     | 110.13  | < 0.001 |
|                                  | Random Effects      | 539286 | 539330 | -269638 | 539276   | 5  | 18                     | 3134.60 | < 0.001 |
| N-Back                           | Interaction (final) | 532890 | 533106 | -266420 | 532840   | 25 | -                      | -       | -       |
|                                  | Main Effects        | 532952 | 533064 | -266463 | 532926   | 13 | 12                     | 85.76   | <0.001  |
|                                  | Random Effects      | 535108 | 535151 | -267549 | 535098   | 5  | 20                     | 2257.90 | <0.001  |
| Number-Letter                    | Interaction (final) | 293694 | 293837 | -146829 | 293658   | 18 | -                      | -       | -       |
|                                  | Main Effects        | 293727 | 293814 | -146853 | 293705   | 11 | 7                      | 46.95   | <0.001  |
|                                  | Random Effects      | 294254 | 294293 | -147122 | 294244   | 5  | 13                     | 585.47  | <0.001  |
| ANT Executive Network            | Interaction (final) | 558334 | 558518 | -279146 | 558292   | 21 | -                      | -       | -       |
|                                  | Main Effects        | 558532 | 558654 | -279252 | 558504   | 14 | 7                      | 212.05  | < 0.001 |
|                                  | Random Effects      | 570127 | 570170 | -285058 | 570117   | 5  | 16                     | 11825   | < 0.001 |
| ANT Alerting & Orienting Network | Interaction (final) | 558538 | 558809 | -279238 | 558476   | 31 | -                      | -       | -       |
|                                  | Main Effects        | 558532 | 558654 | -279252 | 558504   | 14 | 17                     | 27.75   | 0.048   |
|                                  | Random Effects      | 570127 | 570170 | -285058 | 570117   | 5  | 26                     | 11641   | < 0.001 |

*Note* . LTR = Likelihood ratio tests. Comparisons against models with main effects only and random effects only
